# Supplementary material
Source: PubMed Central journal article supplement (PMC5562357)
Supplement: NIHMS874696-supplement-Supplementary.pdf [file NIHMS874696-supplement-Supplementary.pdf]

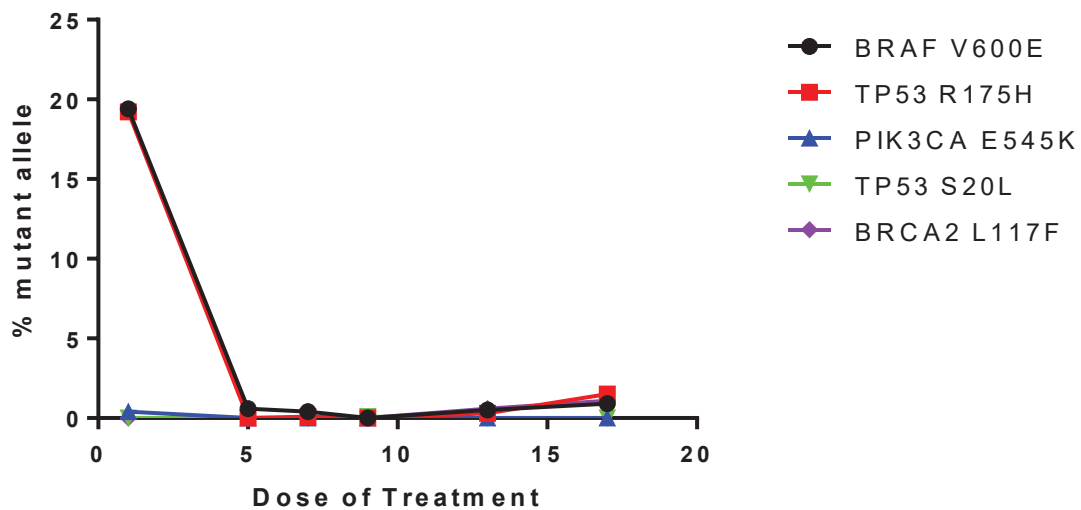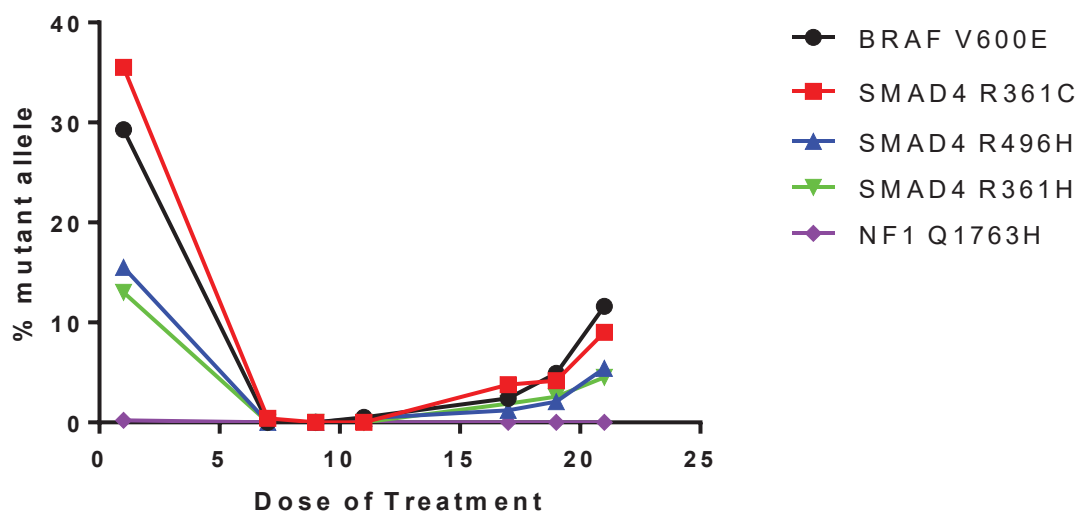

**Supplementary Figure 1:** Trends in various mutation allele frequencies tracked serially over treatment course for two patients on study.

# Non-responders

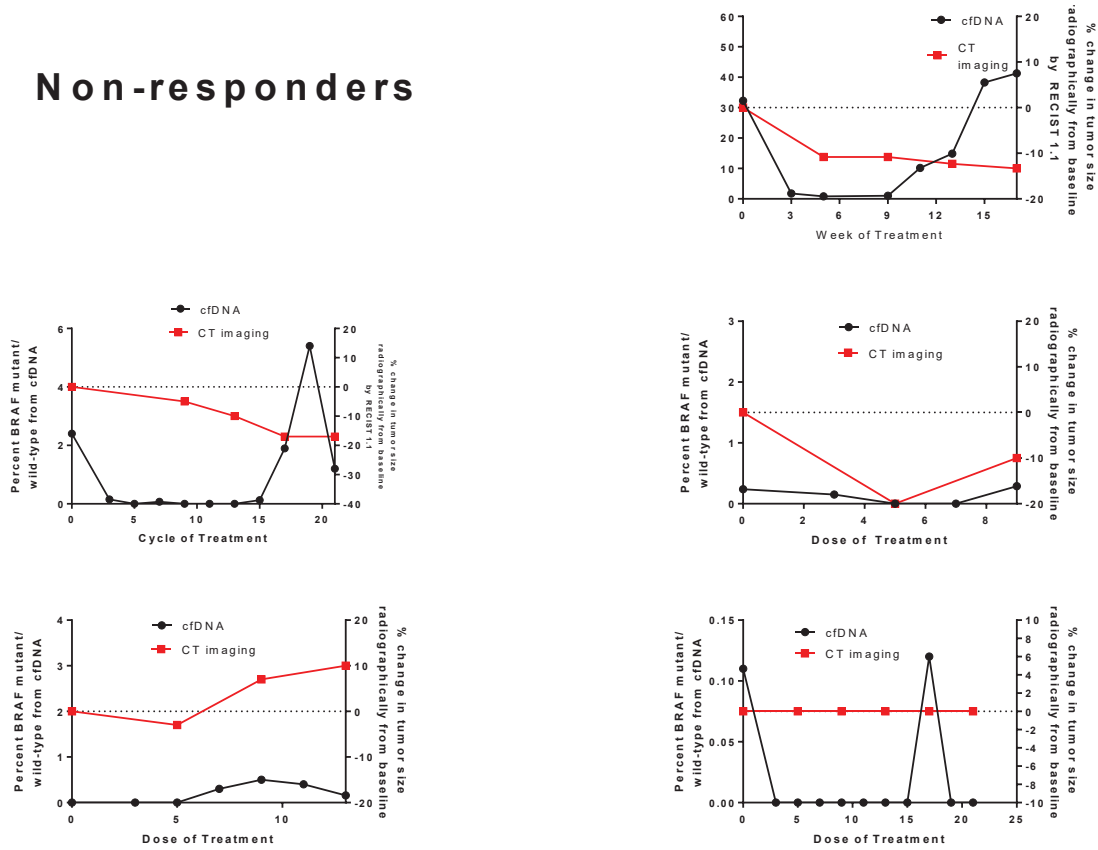

# Responders

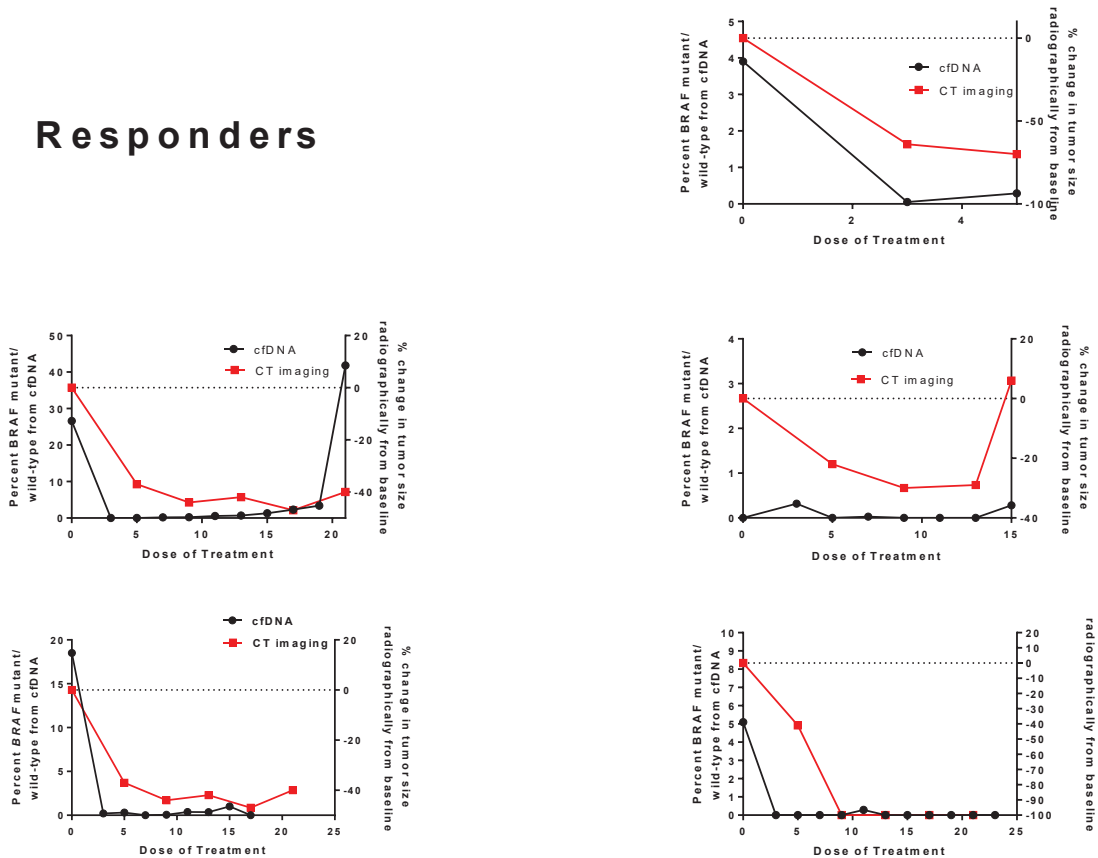

**Supplementary Figure 2:** Trends in cfDNA fraction (black) and radiographic changes (red) for ten other patients on study.

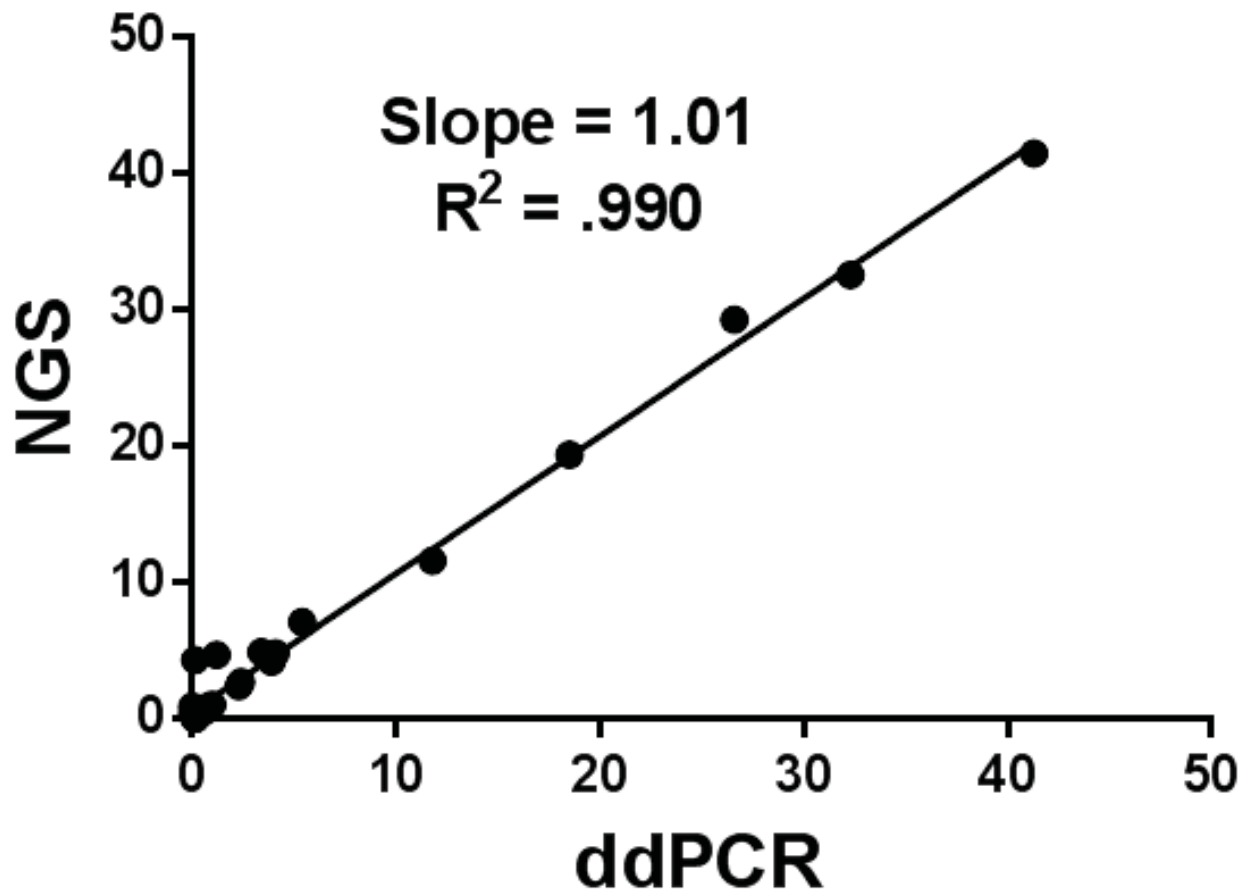

**Supplementary Figure 3:** Analysis of *BRAF*<sup>V600E</sup> allele fraction by cfDNA was validated using two separate methodologies.

# NGS Panel

**Complete\*** or Critical Exon Coverage in 68 Genes

| POINT MUTATIONS |        |        |        | AMPLIFICATIONS | FUSIONS | INDELS                  |
|-----------------|--------|--------|--------|----------------|---------|-------------------------|
| AKT1            | ALK    | APC    | AR     | AR             | ALK     | EGFR exon 19 deletions  |
| AFAR            | ARID1A | ATM    | BRAF   | BRAF           | RET     | EGFR exon 20 insertions |
| BRCA1           | BRCA2  | CCDN1  | CCND2  | CCNE1          | ROS1    |                         |
| CCNE1           | CDH1   | CDK4   | CDK6   | CDK4           | NTRK1   |                         |
| CDKN2A          | CDKN2B | CTNNB1 | EGFR   | CDK6           |         |                         |
| ERBB2           | ESR1   | EZH2   | FBXW7  | EGFR           |         |                         |
| FGFR1           | FGFR2  | FGFR3  | GATA3  | ERBB2          |         |                         |
| GNA11           | GNAQ   | GNAS   | HNF1A  | FGFR1          |         |                         |
| HRAS            | IDH1   | IDH2   | JAK2   | FGFR2          |         |                         |
| JAK3            | KIT    | KRAS   | MAP2K1 | KIT            |         |                         |
| MAP2K2          | MET    | MLH1   | MPL    | KRAS           |         |                         |
| MYC             | NF1    | NFE2L2 | NOTCH1 | MET            |         |                         |
| NPM1            | NRAS   | NTRK1  | PDGFRA | MYC            |         |                         |
| PIK3CA          | PTEN   | PTPN11 | RAF1   | PDGFRA         |         |                         |
| RET             | RHEB   | RHOA   | RIT1   | PIK3CA         |         |                         |
| ROS1            | SMAD4  | SMO    | SRC    | RAF1           |         |                         |
| STK11           | TERT   | TP53   | VHL    |                |         |                         |

**Supplementary Figure 4:** 68-gene panel for which mutation, amplification, deletion, and fusion profiling was available.

\*Complete exon coverage for genes in **bold**

|                                         |            |
|-----------------------------------------|------------|
|                                         |            |
| <b>Age (median), range</b>              | 63 (42-73) |
| <b>Gender</b>                           |            |
| Male                                    | 10 (53%)   |
| Female                                  | 9 (47%)    |
| <b>ECOG PS</b>                          |            |
| 0                                       | 4 (21%)    |
| 1                                       | 14 (74%)   |
| 2                                       | 1 (5%)     |
| <b>Ethnicity</b>                        |            |
| White                                   | 15 (79%)   |
| Hispanic                                | 2 (11%)    |
| Asian                                   | 2 (11%)    |
| <b>Prior Lines of Treatment (range)</b> | 2 (1-4)    |
| <b>Prior Irinotecan</b>                 |            |
| Yes                                     | 14 (74%)   |
| No                                      | 5 (26%)    |
| <b>Prior Cetuximab</b>                  |            |
| Yes                                     | 8 (42%)    |
| No                                      | 11 (58%)   |
| <b>Prior BRAF inhibitor</b>             | 1 (5%)     |
| <b>Prior MEK inhibitor</b>              | 1 (5%)     |

**Supplementary Table 1:** Demographic information
